# Supplementary material for: Long-circulating PEGylated manganese ferrite nanoparticles for MRI-based molecular imaging
Source: Royal Society of Chemistry journal article supplement (doi:10.1039/c4nr05781c), 2014-12-16
Supplement: c4nr05781c1.pdf [file c4nr05781c1.pdf]

ELECTRONIC SUPPLEMENTARY INFORMATION.

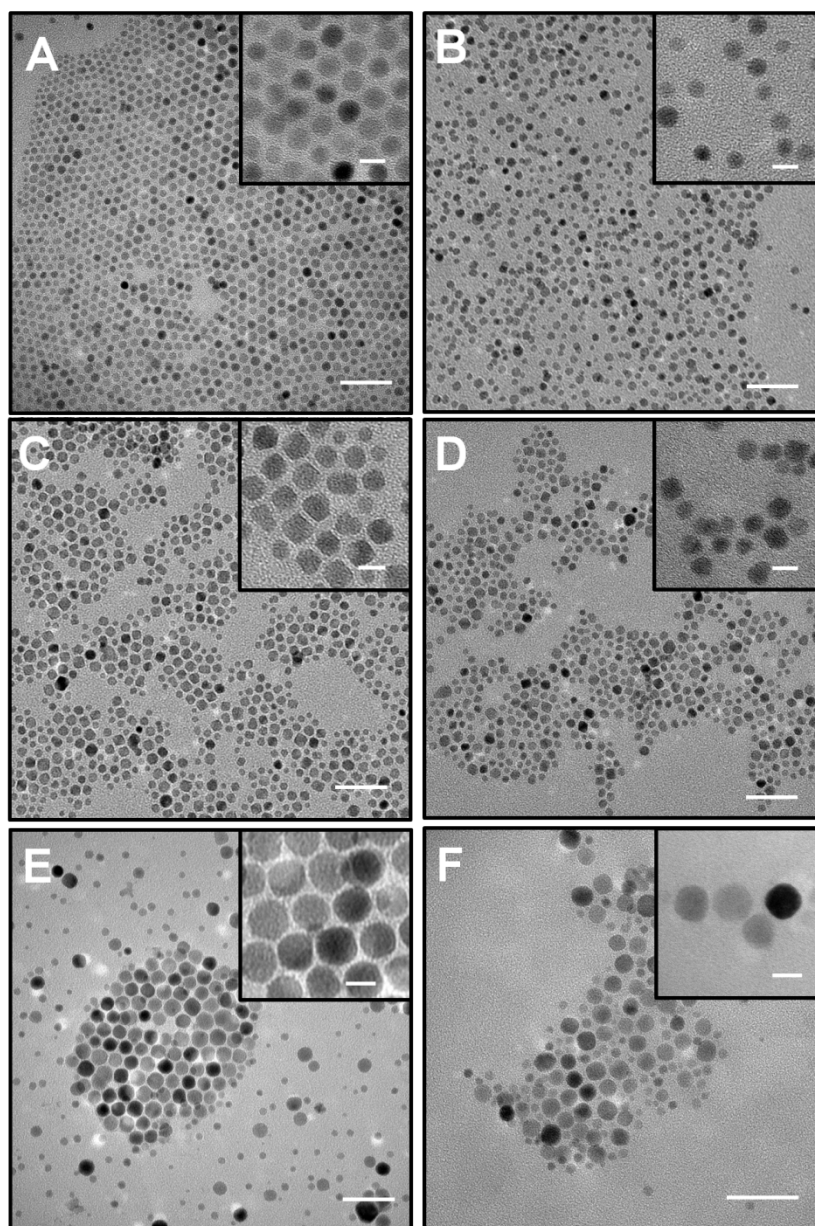

**Fig. S1.** Representative TEM images at low magnification of 7.5, 9 y 12 nm magnetic nanoparticles capped with oleic acid (left panel: A, C, E) and capped with 3kDa PEGylated gallol anchor (right panel: B, D and F). Insets correspond to high magnification TEM images of nanoparticles. Scale bars correspond to 50 nm for TEM images at low magnification, and 10 nm for high magnification images.

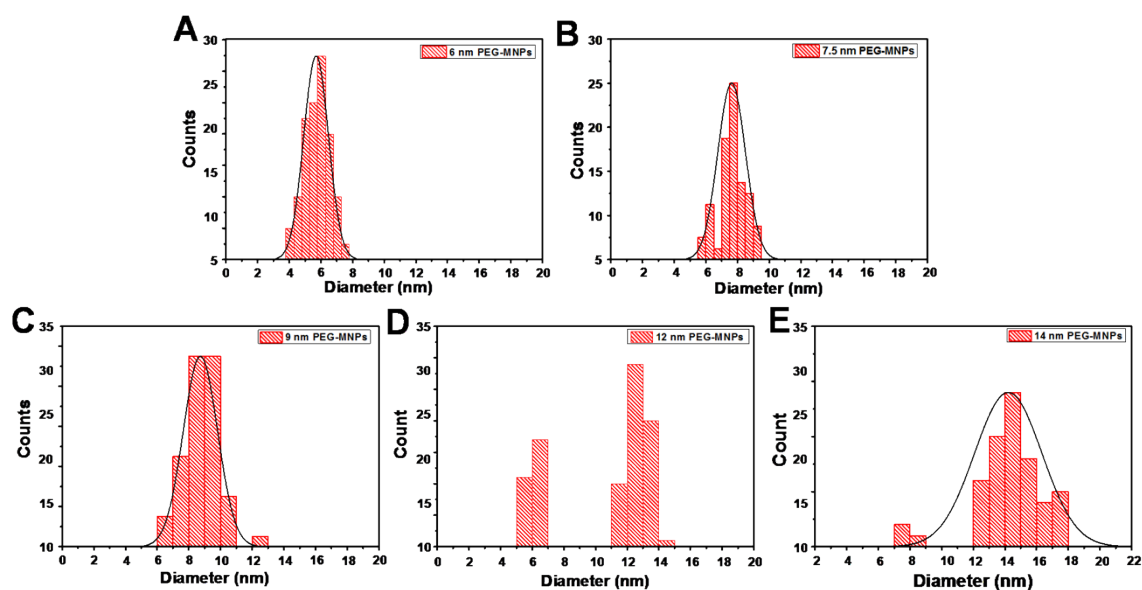

**Fig. S2.** Statistics on the TEM sizes of A) 6 nm, B) 7.5 nm, C) 9 nm, D) 12 nm and E) 14 nm PEGylated manganese ferrite nanoparticles.

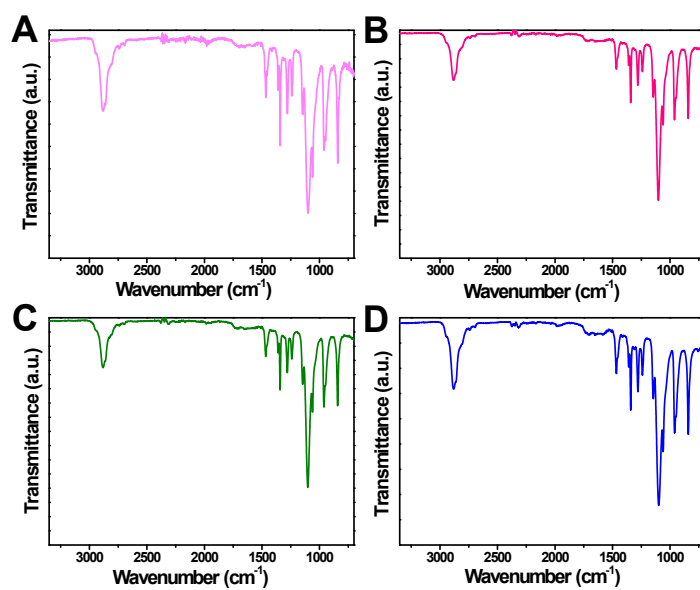

**Fig. S3.** FTIR spectra of A) 6 nm, B) 7.5 nm, C) 9 nm, D) 12 nm and E) 14 nm PEGylated manganese ferrite nanoparticles

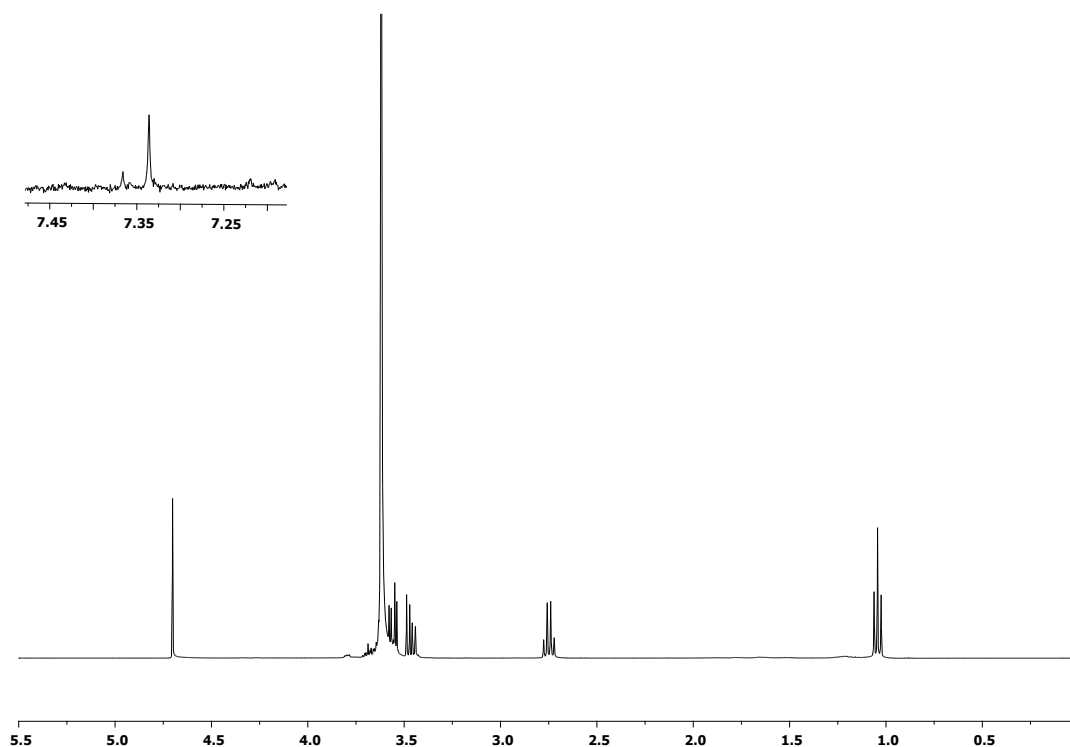

**Fig. S4.**  $^1\text{H}$  NMR (400 MHz,  $\text{D}_2\text{O}$ ) of the filtrate solution from the centrifuge filter device (cutoff: 100 kDa) during the purification process of the PEGylated MNPs. The filtrate solutions was free-dried and re-suspended in  $\text{D}_2\text{O}$ . The spectrum  $^1\text{H}$  400 MHz NMR shows the characteristic peaks of the gallol-derived PEG,  $\delta$  (ppm): 7.32 (Gallol-derived), 3.7-3.4 (PEG), and the presence of triethylamine  $\delta$  (ppm): 2.7 ( $\text{CH}_2$ ), 1.0 ( $\text{CH}_3$ ).

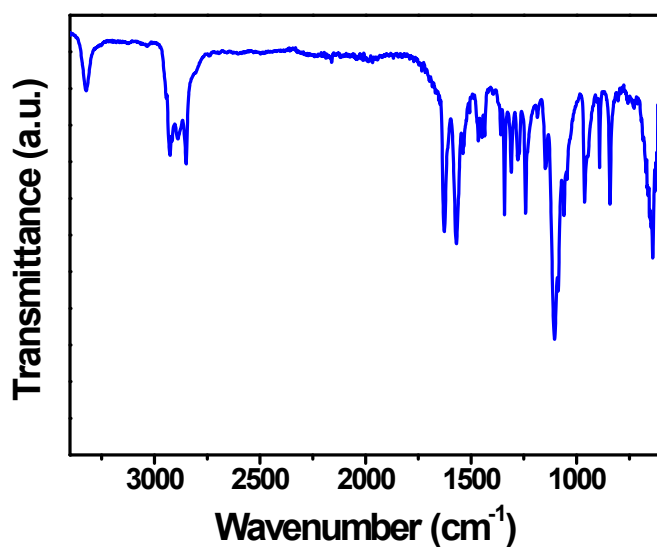

**Fig. S5.** FTIR spectrum of the filtrate solution from the centrifuge filter device (cutoff: 100 kDa) during the purification process of the PEGylated MNPs. The filtrate solution

dried on a glass slide, showing the characteristic peaks of the Gallol-PEG-OH with the presence of the peaks of the base triethylamine.

| MNP    | molecules/nm <sup>2</sup> |
|--------|---------------------------|
| 6 nm   | 1.1                       |
| 7.5 nm | 1.0                       |
| 9 nm   | 1.4                       |
| 12 nm  | 2.3                       |
| 14 nm  | 2.8                       |

Table S1. Dispersant packing density on magnetic nanoparticles.

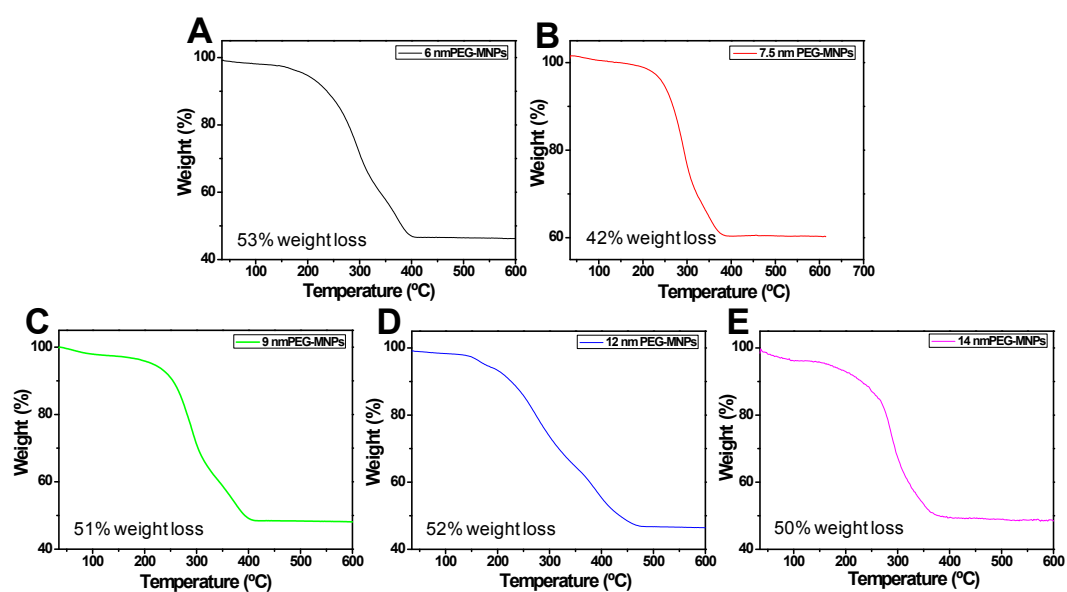

**Fig. S6.** Thermogravimetric analysis of A) 6 nm, B) 7.5 nm, C) 9 nm, D) 12 nm and E) 14 nm PEGylated manganese ferrite nanoparticles.

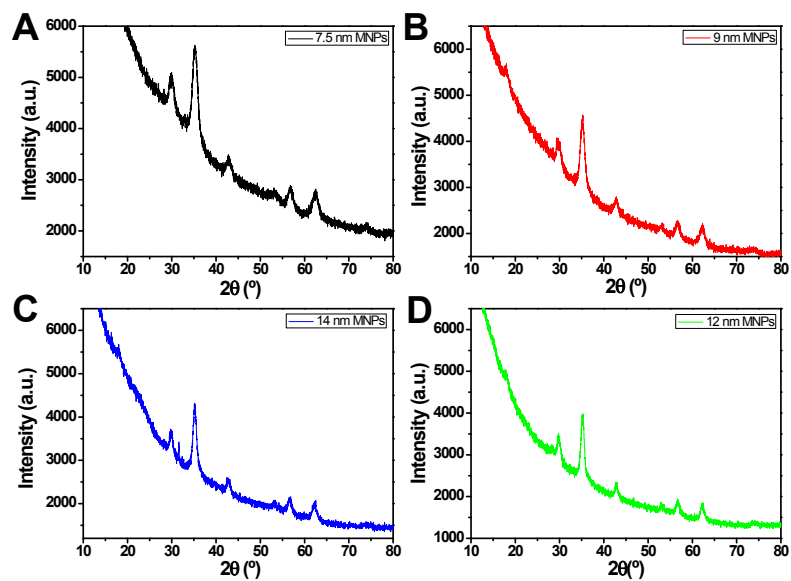

**Fig. S7.** XRD patterns of A) 7.5 nm, B) 9 nm, C) 12 nm and D) 14 nm oleic acid capped manganese ferrite nanoparticles.

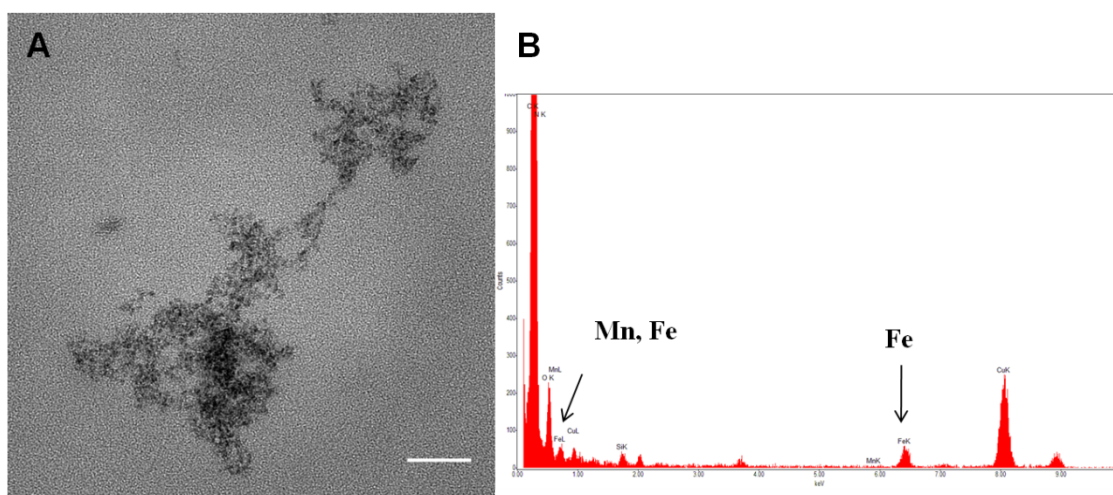

**Fig. S8.** A) TEM image of excreted 6 nm MNP through the urine after purification and concentration by centrifugal PALL filter (MWCO: 100 kDa). Scale bars correspond to 50 nm. B) EDX spectrum of excreted 6 nm MNPs.
